# Supplementary material
Source: Research Square preprint supplement (doi:10.21203/rs.3.rs-9925643/v1)
Supplement: Supplementary file 1 [file c764f1d04ad8577914bc27ad.docx]

**Supplementary Table S1.** Obesity-related complications in EASO-defined obesity

Note: Hypertension, cardiovascular disease, lung disease, and type 2 diabetes were coded as present if any corresponding criterion was met. Depressive symptoms were assessed using the 8-item Center for Epidemiologic Studies Depression Scale (CES-D).

**Supplementary Table S2.** Generalized estimated equation examining the effect of EASO-defined obesity on longitudinal change of ADL/IADL scores by age and sex.

Note: Models were adjusted for age, sex, marital status, education levels, smoking, alcohol intake, and physical activity.

**Supplementary Table S3.** Baseline characteristics of participants without functional limitations by EASO-defined obesity (n=5,221)

**Supplementary Table S4.** Generalized estimated equation examining the effect of EASO-defined obesity on longitudinal change of ADL/IADL scores by time as a categorical variable.

Note: Models were adjusted for age, sex, marital status, education levels, smoking, alcohol intake, and physical activity.

**Supplementary Table S5.** Associations of EASO-defined obesity with incident functional limitations: Cox models (exclude participants who experienced incident functional limitation in the previous two years of follow-up).

Note: Models were adjusted for age, sex, marital status, education levels, smoking, alcohol intake, and physical activity
